# Supplementary material for: Fracture strength of cad-cam milled polyetheretherketone (PEEK) post-cores vs conventional post-cores; an in vitro study
Source: PeerJ. 2024 Sep 5;12:e18012. doi: 10.7717/peerj.18012 (PMC11380836; doi:10.7717/peerj.18012)
Supplement: Supplemental Information 1 [file peerj-12-18012-s001.xlsx]

## Sheet: Sayfa1
GROUPS1-10	Fracture strength values
Z1	475.55
Z2	399.33
Z3	461.87
Z4	391.79
Z5	424.84
Z6	443.03
Z7	318.63
Z8	384.74
Z9	416.12
Z10	377.55
UP1	294.4
UP2	282.63
UP3	272.07
UP4	296.23
UP5	213.66
UP6	286.85
UP7	314.65
UP8	246.24
UP9	352.22
UP10	307.45
CP1	225.74
CP2	293.2
CP3	226.55
CP4	271.21
CP5	258.6
CP6	277.86
CP7	301.17
CP8	336.11
CP9	311.65
CP10	477.95
M1	467.76
M2	347.81
M3	386.65
M4	324.15
M5	321.98
M6	538.83
M7	368
M8	361.26
M9	301.22
M10	344.05
GF1	325.95
GF2	313.6
GF3	302.38
GF4	327.31
GF5	452.25
GF6	435.66
GF7	320.17
GF8	342.64
GF9	357
GF10	301.17
TP1	224.85
TP2	241.59
TP3	325.07
TP4	266.33
TP5	436.71
TP6	269.33
TP7	278.17
TP8	187.98
TP9	312.61
TP10	258.16
